# Supplementary material for: Diagnosing ozone-NOx-VOC sensitivity and revealing causes of ozone increases in China based on 2013–2021 satellite retrievals
Source: Copernicus journal article supplement (doi:10.5194/acp-2022-347), 2022-06-08
Supplement: Supplementary file 1 [file acp-2022-347-supplement.pdf]

*Supplement of*

**Diagnosing ozone-NO<sub>x</sub>-VOC sensitivity and revealing causes of ozone increases in China based on 2013-2021 satellite retrievals**

**Jie Ren and Shaodong Xie**

*Correspondence to:* Shaodong Xie (sdxie@pku.edu.cn)

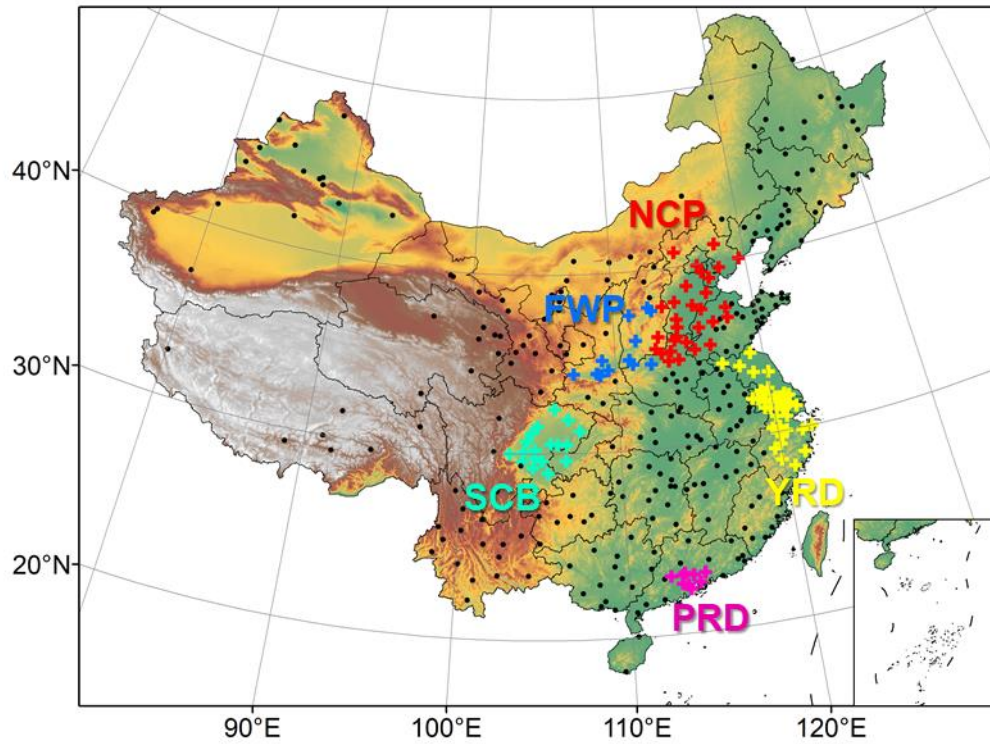

**Figure S1.** Location of cities and key regions, including city clusters of North China Plain (NCP), Yangtze River Delta (YRD), Fenwei Plain (FWP), Sichuan Basin (SCB), and Pearl River Delta (PRD).

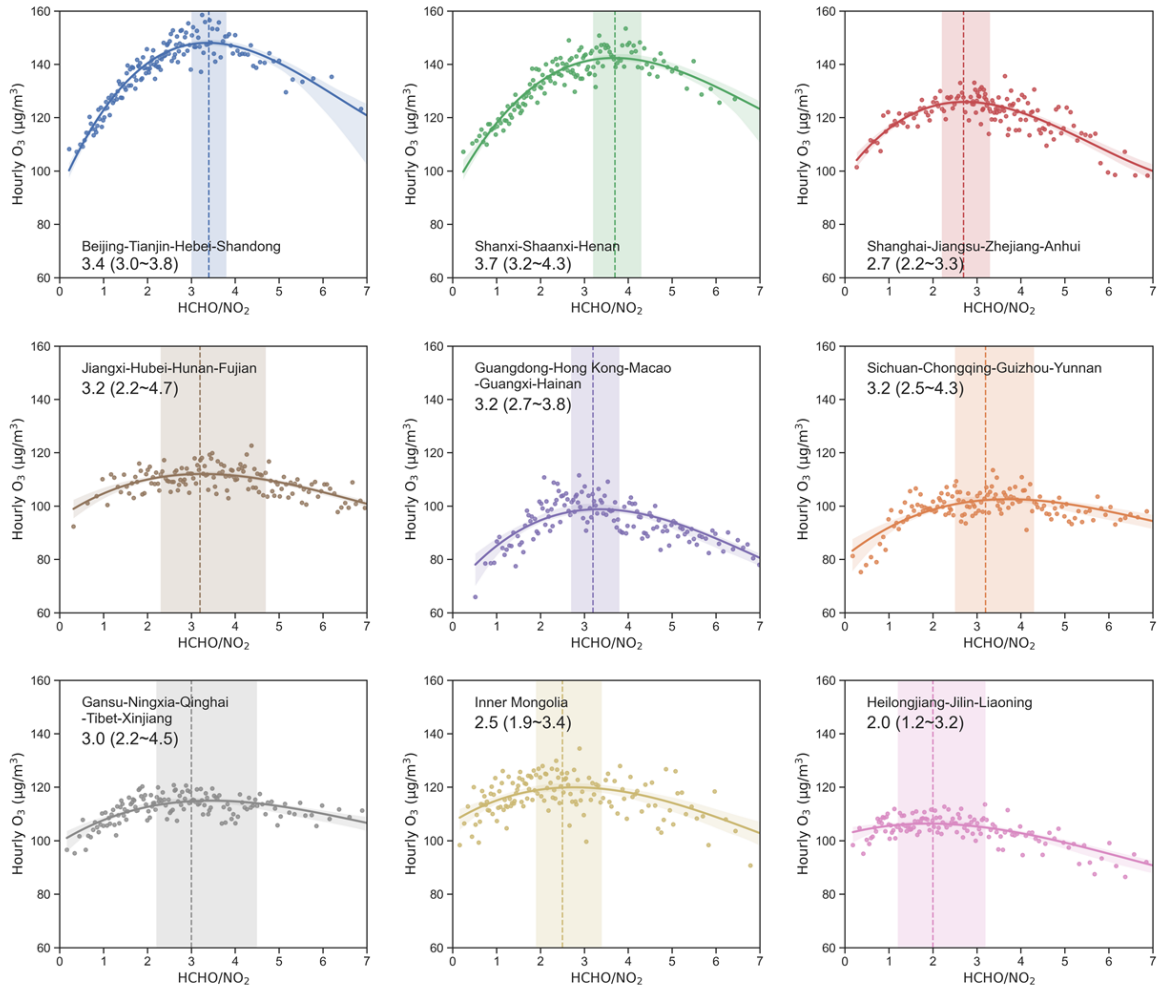

**Figure S2.** The same as Figure 3b but plotted with individual panels for nine regions in China.

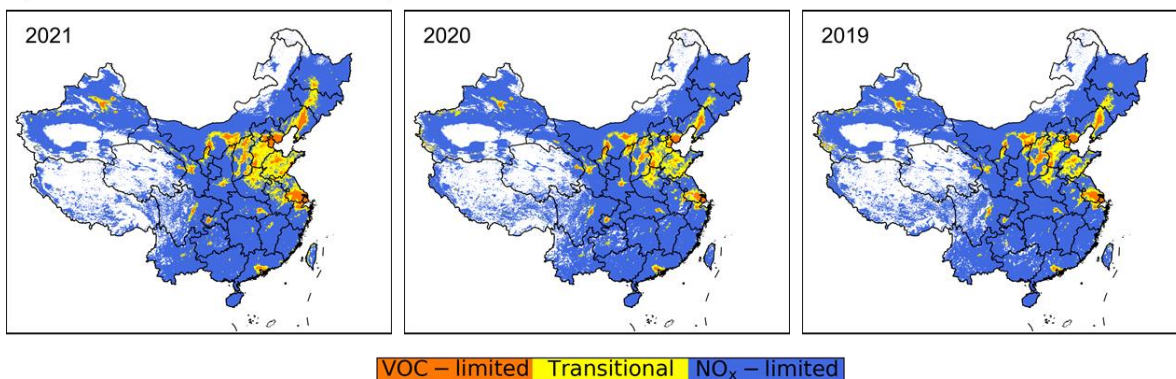

**Figure S3.** Ozone sensitivity classification over China from April to September 2019–2021 using the same HCHO/NO<sub>2</sub> threshold across China. Only polluted regions are displayed (defined as average TROPOMI NO<sub>2</sub> columns higher than  $1.0 \times 10^{15}$  molecules/cm<sup>2</sup>).

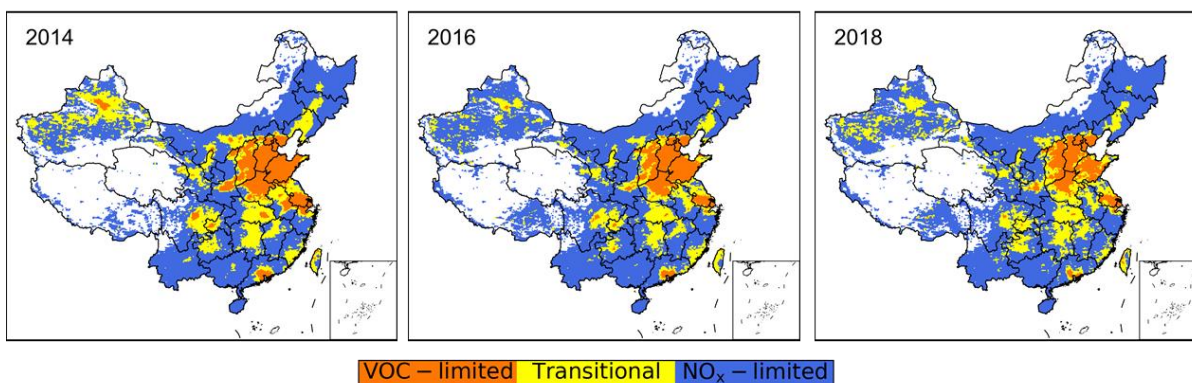

**Figure S4.** The same as Fig. 4 but for 2014, 2016, and 2018.

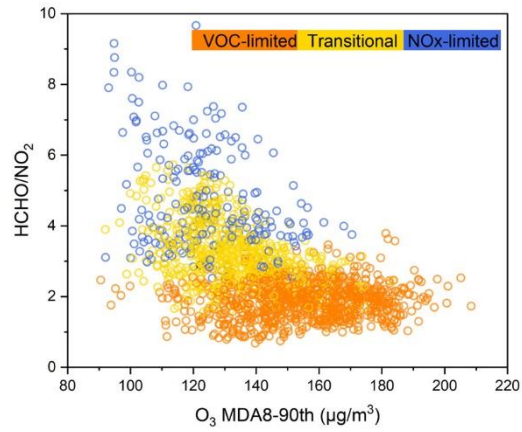

**Figure S5.** The 90th percentile of MDA8-O<sub>3</sub> and ozone sensitivity regime for all monitoring sites in 2021

(a) Satellite NO<sub>2</sub> ( $10^{15}$  molec/cm<sup>2</sup>)

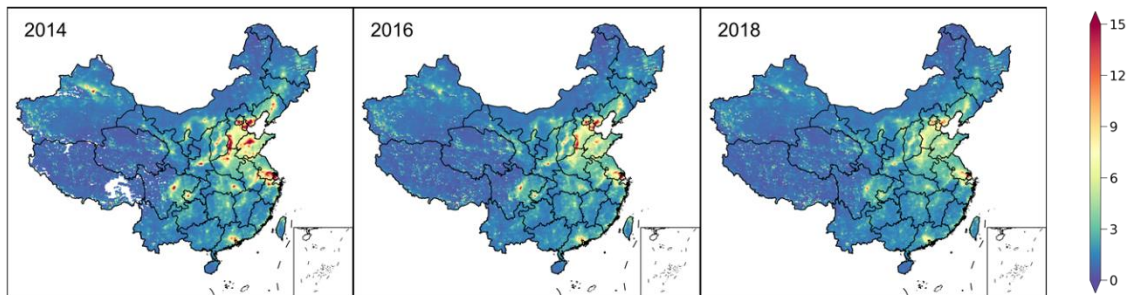

(b) Satellite HCHO ( $10^{15}$  molec/cm<sup>2</sup>)

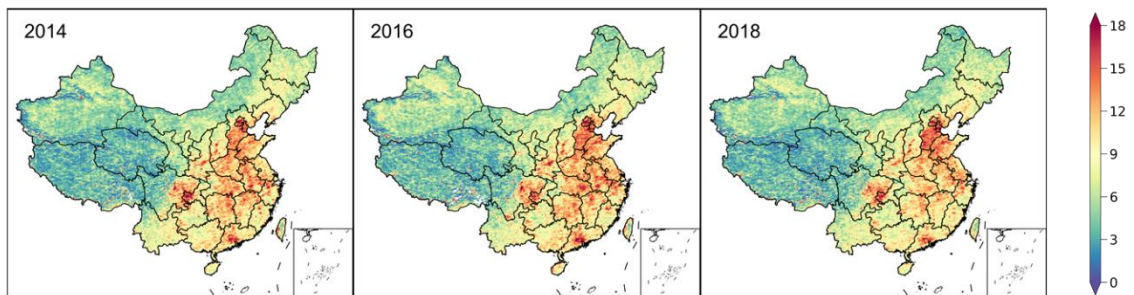

**Figure S6.** The same as Fig. 5a and 6a but for 2014, 2016, and 2018.

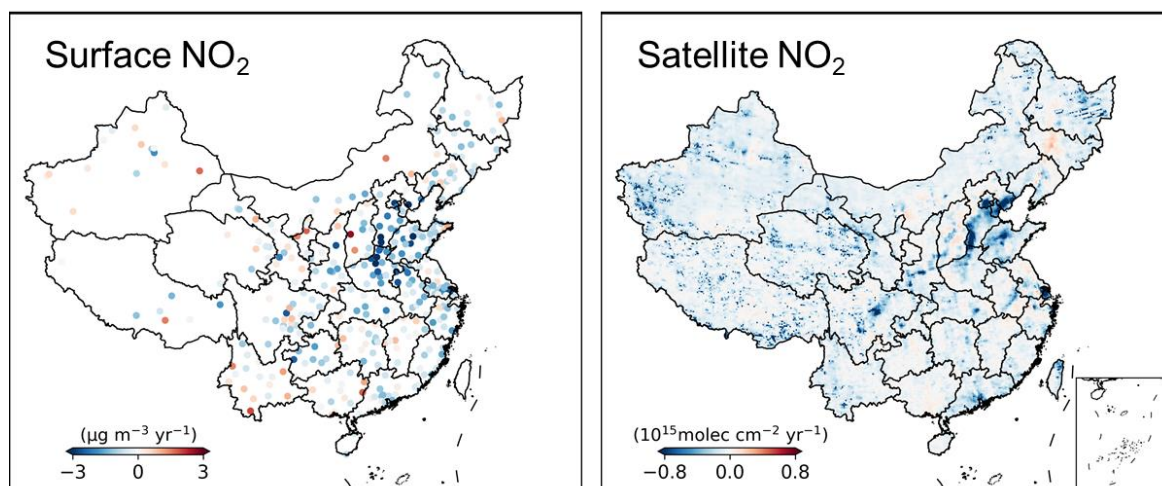

**Figure S7.** Trends in April-September average surface NO<sub>2</sub> concentrations and satellite-based NO<sub>2</sub> columns in 2015-2021.

**Table S1.** Proportions of O<sub>3</sub> sensitivity regimes in four megacity clusters<sup>a</sup> from April to September of 2021

| Region       | NCP   | YRD   | PRD   | SCB   |
|--------------|-------|-------|-------|-------|
| VOC-limited  | 59.2% | 23.5% | 8.0%  | 4.3%  |
| Transitional | 26.7% | 31.4% | 11.0% | 27.4% |
| NOx-limited  | 14.1% | 45.1% | 81.1% | 68.3% |

<sup>a</sup> The four megacity clusters are NCP (Beijing, Tianjin, Hebei, Shanxi, Henan, and Shandong), YRD (Shanghai, Zhejiang, and Jiangsu), PRD (Guangdong), and SCB (Chongqing and eastern Sichuan).
